# Supplementary material for: Chronic glucolipotoxic conditions in pancreatic islets impair insulin secretion due to dysregulated calcium dynamics, glucose responsiveness and mitochondrial activity
Source: PubMed Central journal article supplement (PMC3704974; doi:10.1186/1471-2121-14-31), 2013-07-01

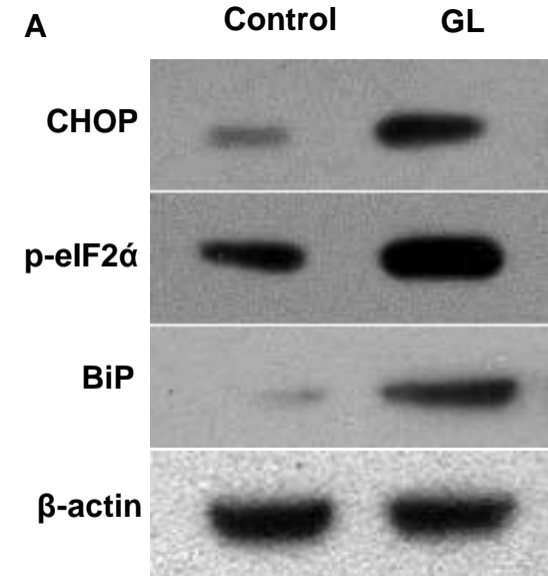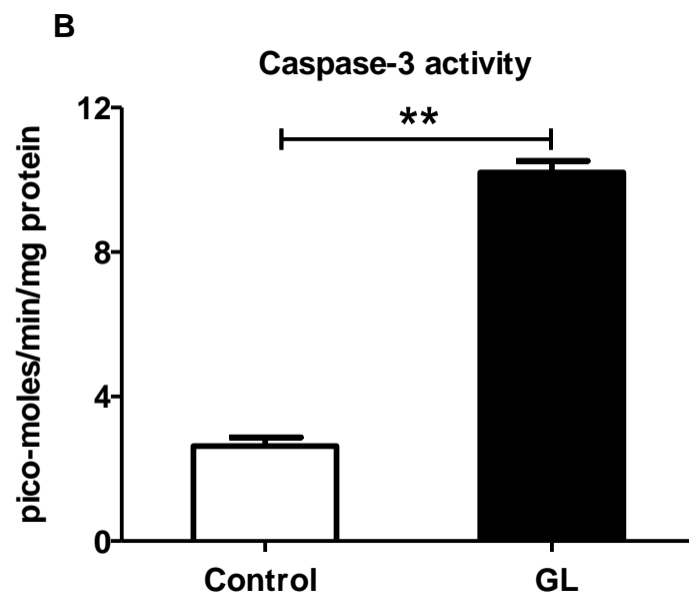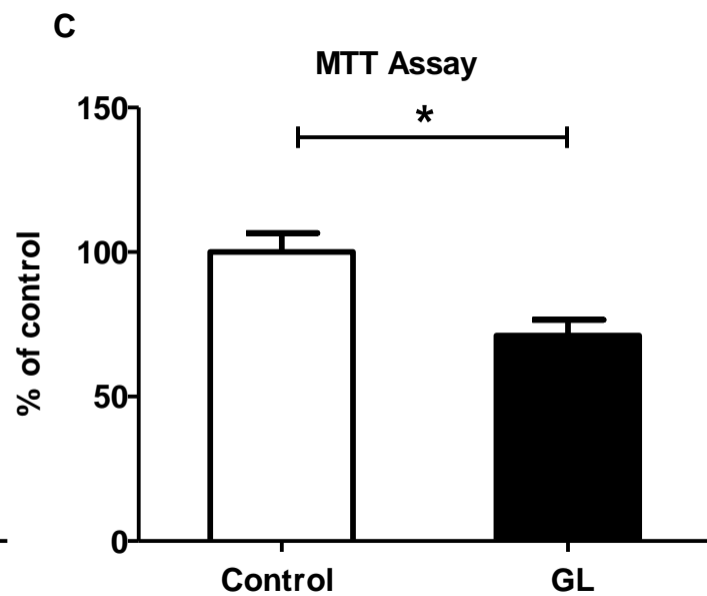

Supplement: 1471-2121-14-31-S2.pdf [file 1471-2121-14-31-S2.pdf]
